# Supplementary material for: Differential effects of 3,5-T2 and T3 on the gill regeneration and metamorphosis of the Ambystoma mexicanum (axolotl)
Source: Front Endocrinol (Lausanne). 2023 Jul 10;14:1208182. doi: 10.3389/fendo.2023.1208182 (PMC10364608; doi:10.3389/fendo.2023.1208182)
Supplement: Supplementary file 4 [file DataSheet_3.xlsx]

## Sheet: Both down
T2 and T3 down-regulated genes
gene	T2	CTRL	T3	GeneCards	NCBI
AMEX60DDU001004849	-0.304421	1.34824	-1.04382	AMEX60DDU001004849	AMEX60DDU001004849
AMEX60DDU001011161	-0.592135	1.40829	-0.816152	AMEX60DDU001011161	AMEX60DDU001011161
AMEX60DDU001013692	-1.12906	1.30204	-0.172975	AMEX60DDU001013692	AMEX60DDU001013692
CENPF	-0.19407	1.31019	-1.11612	CENPF	CENPF
KRT12	-0.154248	1.29456	-1.14031	KRT12	KRT12
AMEX60DDU001020869	-1.0214	1.35779	-0.336391	AMEX60DDU001020869	AMEX60DDU001020869
DEPDC1B	-0.648956	1.41266	-0.763705	DEPDC1B	DEPDC1B
CCNB1	-0.514831	1.39812	-0.883291	CCNB1	CCNB1
GEN1	-0.715734	1.41418	-0.698444	GEN1	GEN1
AMEX60DDU001034885	-0.286397	1.34257	-1.05617	AMEX60DDU001034885	AMEX60DDU001034885
AACS	-0.540005	1.40195	-0.861941	AACS	AACS
PARPI_0029472	-0.893592	1.39607	-0.502477	PARPI_0029472	PARPI_0029472
CHEK2	-0.368067	1.36657	-0.998504	CHEK2	CHEK2
PEBP1	-0.692535	1.41411	-0.72158	PEBP1	PEBP1
NCAPH	-0.301526	1.34735	-1.04582	NCAPH	NCAPH
NEURL3	-1.0559	1.34269	-0.286788	NEURL3	NEURL3
PLSCR1	-0.656486	1.41303	-0.756547	PLSCR1	PLSCR1
CDCA2	-0.171283	1.30137	-1.13009	CDCA2	CDCA2
LOC115478596	-0.611826	1.41011	-0.798285	LOC115478596	LOC115478596
PCLAF	-0.257111	1.33289	-1.07578	PCLAF	PCLAF
SENP8	-0.141981	1.28955	-1.14757	SENP8	SENP8
RPP25	-0.460276	1.3882	-0.927925	RPP25	RPP25
INCENP	-0.260459	1.33402	-1.07356	INCENP	INCENP
SINHCAF	-0.603061	1.40934	-0.806277	SINHCAF	SINHCAF
HGF	-0.231419	1.32395	-1.09253	HGF	HGF
RAD51AP1	-0.41598	1.37855	-0.962574	RAD51AP1	RAD51AP1
FOXM1	-0.416961	1.37878	-0.961822	FOXM1	FOXM1
CDKN1A	-0.682062	1.41392	-0.731859	CDKN1A	CDKN1A
AMEX60DD009654	-0.242301	1.32779	-1.08548	AMEX60DD009654	AMEX60DD009654
BRCA1	-0.2859	1.34241	-1.05651	BRCA1	BRCA1
KRT15	-0.152838	1.29399	-1.14115	KRT15	KRT15
TOP2A	-0.261871	1.3345	-1.07263	TOP2A	TOP2A
KIFC1	-0.460117	1.38817	-0.928052	KIFC1	KIFC1
KNL1	-0.511358	1.39756	-0.886198	KNL1	KNL1
AMEX60DD011505	-0.647371	1.41258	-0.765205	AMEX60DD011505	AMEX60DD011505
AMEX60DD011519	-0.221411	1.32035	-1.09894	AMEX60DD011519	AMEX60DD011519
BUB1B	-0.471488	1.39042	-0.918931	BUB1B	BUB1B
CALM1	-0.32427	1.35425	-1.02998	CALM1	CALM1
SIX4	-0.542191	1.40225	-0.860064	SIX4	SIX4
NUSAP1	-0.245877	1.32903	-1.08315	NUSAP1	NUSAP1
MCM7	-0.311343	1.35037	-1.03902	MCM7	MCM7
ANKLE1	-0.133132	1.28587	-1.15274	ANKLE1	ANKLE1
UHRF1	-0.230849	1.32374	-1.09289	UHRF1	UHRF1
AMEX60DD017318	-1.09616	1.32192	-0.22576	AMEX60DD017318	AMEX60DD017318
NME4	-0.711302	1.41421	-0.702903	NME4	NME4
CCNF	-0.313771	1.35111	-1.03733	CCNF	CCNF
LOC112546850	-0.422148	1.37998	-0.957833	LOC112546850	LOC112546850
LOC101946377	-0.598008	1.40886	-0.810856	LOC101946377	LOC101946377
AMEX60DD020780	-0.54515	1.40267	-0.857518	AMEX60DD020780	AMEX60DD020780
PLK1	-0.361063	1.36469	-1.00362	PLK1	PLK1
LOC115096443	-0.404707	1.37588	-0.971171	LOC115096443	LOC115096443
SUV39H1	-0.234408	1.32501	-1.0906	SUV39H1	SUV39H1
CDCA3	-0.405407	1.37605	-0.970639	CDCA3	CDCA3
NCAPD2	-0.320713	1.35319	-1.03248	NCAPD2	NCAPD2
RTEL1	-0.448288	1.38573	-0.937441	RTEL1	RTEL1
TPX2	-0.139082	1.28835	-1.14927	TPX2	TPX2
AURKA	-0.39513	1.37353	-0.978405	AURKA	AURKA
UBE2C	-0.252445	1.3313	-1.07885	UBE2C	UBE2C
SHROOM3	-0.599933	1.40905	-0.809115	SHROOM3	SHROOM3
TMEM238	-0.652263	1.41283	-0.760568	TMEM238	TMEM238
AAAS	-0.257287	1.33295	-1.07566	AAAS	AAAS
ESCO2	-0.294574	1.34517	-1.05059	ESCO2	ESCO2
PBK	-0.4972	1.39516	-0.897958	PBK	PBK
PEBP1	-0.874334	1.3998	-0.525462	PEBP1	PEBP1
FDFT1	-0.487462	1.39342	-0.905958	FDFT1	FDFT1
LOC115474895	-0.576296	1.40659	-0.830293	LOC115474895	LOC115474895
KIF4A	-0.240869	1.32728	-1.08642	KIF4A	KIF4A
AMEX60DD039032	-0.389	1.372	-0.983001	AMEX60DD039032	AMEX60DD039032
RTTN	-0.49651	1.39504	-0.898527	RTTN	RTTN
DSEL	-0.606129	1.40962	-0.803487	DSEL	DSEL
MCM4	-0.192754	1.30969	-1.11694	MCM4	MCM4
AMEX60DD041777	-0.324964	1.35445	-1.02949	AMEX60DD041777	AMEX60DD041777
MAD2L1	-0.316449	1.35191	-1.03547	MAD2L1	MAD2L1
SMC2	-0.20572	1.31458	-1.10886	SMC2	SMC2
LOC101951200	-0.941877	1.38453	-0.442653	LOC101951200	LOC101951200
FAM3B	-1.0416	1.34923	-0.307635	FAM3B	FAM3B
AMEX60DD051228	-0.819355	1.40792	-0.588567	AMEX60DD051228	AMEX60DD051228
TMEM52	-0.665161	1.4134	-0.748239	TMEM52	TMEM52
AIFM2	-0.563963	1.40513	-0.841166	AIFM2	AIFM2
CDK1	-0.515145	1.39817	-0.883028	CDK1	CDK1
KIF11	-0.289532	1.34357	-1.05404	KIF11	KIF11
NCAPD3	-0.186566	1.30732	-1.12076	NCAPD3	NCAPD3
SPAG5	-0.387225	1.37155	-0.984328	SPAG5	SPAG5
SGO2	-0.310432	1.35009	-1.03966	SGO2	SGO2

## Sheet: T2down
T2 down-regulated genes
gene	T2	CTRL	T3	GeneCards	NCBI
KY	-1.28933	1.14788	0.141448	KY	KY

## Sheet: T3down
T3 down-regulated genes
gene	T2	CTRL	T3	GeneCards	NCBI
VLDLR	0.223782	1.09742	-1.32121	VLDLR	VLDLR
AMEX60DDU001013621	-0.119478	1.28011	-1.16063	AMEX60DDU001013621	AMEX60DDU001013621
CDO1	0.181432	1.12391	-1.30534	CDO1	CDO1
AMEX60DDU001027007	0.0573647	1.19505	-1.25242	AMEX60DDU001027007	AMEX60DDU001027007
AMEX60DDU001027547	0.0740124	1.18606	-1.26007	AMEX60DDU001027547	AMEX60DDU001027547
AMEX60DDU001027548	0.269945	1.06725	-1.3372	AMEX60DDU001027548	AMEX60DDU001027548
AMEX60DDU001034886	-0.00956839	1.2295	-1.21993	AMEX60DDU001034886	AMEX60DDU001034886
AMEX60DDU001035539	0.178653	1.12561	-1.30426	AMEX60DDU001035539	AMEX60DDU001035539
MMP23B	0.0312816	1.2088	-1.24009	MMP23B	MMP23B
PASK	0.370095	0.997015	-1.36711	PASK	PASK
LAMB4	0.245582	1.08335	-1.32893	LAMB4	LAMB4
KRT15	0.0605116	1.19337	-1.25388	KRT15	KRT15
KRT12	-0.0183503	1.23382	-1.21547	KRT12	KRT12
AMEX60DD010121	-0.00337177	1.22643	-1.22306	AMEX60DD010121	AMEX60DD010121
KRT12	-0.0493213	1.24866	-1.19934	KRT12	KRT12
EOD39_13346	0.570168	0.835711	-1.40588	EOD39_13346	EOD39_13346
AAES_42715	0.0704359	1.18801	-1.25844	AAES_42715	AAES_42715
LOC114816551	-0.0468427	1.24749	-1.20065	LOC114816551	LOC114816551
NOD2	-0.0769881	1.26142	-1.18443	NOD2	NOD2
FAM107A	0.702784	0.71142	-1.4142	FAM107A	FAM107A
PITX1	0.225226	1.0965	-1.32173	PITX1	PITX1
CARD10	0.200202	1.11231	-1.31251	CARD10	CARD10
LOC112121477	-0.02997	1.23945	-1.20948	LOC112121477	LOC112121477
AMEX60DD029706	0.879788	0.519001	-1.39879	AMEX60DD029706	AMEX60DD029706
AMEX60DD029820	-0.00307163	1.22628	-1.22321	AMEX60DD029820	AMEX60DD029820
GEN1	-0.103067	1.27302	-1.16995	GEN1	GEN1
MELK	-0.0366378	1.24265	-1.20601	MELK	MELK
POLQ	-0.119739	1.28022	-1.16048	POLQ	POLQ

## Sheet: T3up
gene	T2	CTRL	T3	GeneCards	NCBI
LOC112843268	-0.251759	-1.0793	1.33106	LOC112843268	LOC112843268
DHCR7	-0.497812	-0.897452	1.39526	DHCR7	DHCR7
ITGA5	-0.0363413	-1.20617	1.24251	ITGA5	ITGA5
CBLIF	-0.0891126	-1.17775	1.26687	CBLIF	CBLIF
AMEX60DDU001008372	-0.418173	-0.960891	1.37906	AMEX60DDU001008372	AMEX60DDU001008372
AMEX60DDU001010337	-0.499546	-0.896019	1.39557	AMEX60DDU001010337	AMEX60DDU001010337
AMEX60DDU001012632	0.0821962	-1.26377	1.18158	AMEX60DDU001012632	AMEX60DDU001012632
AMEX60DDU001012633	0.0827225	-1.26401	1.18129	AMEX60DDU001012633	AMEX60DDU001012633
METTL7A	-0.620845	-0.789993	1.41084	METTL7A	METTL7A
NOXO1	-0.411117	-0.966293	1.37741	NOXO1	NOXO1
A2M	-0.0758293	-1.18507	1.2609	A2M	A2M
HR	-0.508408	-0.888662	1.39707	HR	HR
AMEX60DDU001030549	-0.640817	-0.771386	1.4122	AMEX60DDU001030549	AMEX60DDU001030549
AMEX60DDU001032684	-0.185596	-1.12135	1.30695	AMEX60DDU001032684	AMEX60DDU001032684
AMEX60DDU001032688	-0.147268	-1.14445	1.29172	AMEX60DDU001032688	AMEX60DDU001032688
ATP8B2	-0.537153	-0.864384	1.40154	ATP8B2	ATP8B2
AMEX60DDU001034479	-0.0940453	-1.17501	1.26906	AMEX60DDU001034479	AMEX60DDU001034479
MMP11	-0.366855	-0.999392	1.36625	MMP11	MMP11
SPPL3	-0.450219	-0.935915	1.38613	SPPL3	SPPL3
PROM2	-0.00820836	-1.22062	1.22883	PROM2	PROM2
PROM2	-0.0108023	-1.21931	1.23011	PROM2	PROM2
AMEX60DD002706	0.118818	-1.27982	1.16101	AMEX60DD002706	AMEX60DD002706
SORBS3	-0.0186606	-1.21531	1.23397	SORBS3	SORBS3
AMEX60DD003447	-0.732466	-0.681441	1.41391	AMEX60DD003447	AMEX60DD003447
ANKDD1A	-0.700448	-0.713745	1.41419	ANKDD1A	ANKDD1A
ST8SIA2	-0.184106	-1.12227	1.30638	ST8SIA2	ST8SIA2
ADAMTS17	-0.280087	-1.06044	1.34053	ADAMTS17	ADAMTS17
ADPGK	-0.442545	-0.941962	1.38451	ADPGK	ADPGK
AMPD3	-0.414547	-0.963672	1.37822	AMPD3	AMPD3
AMEX60DD004953	0.0344002	-1.24158	1.20718	AMEX60DD004953	AMEX60DD004953
CRY1	-0.347382	-1.01353	1.36091	CRY1	CRY1
CDKN1B	-0.177513	-1.1263	1.30381	CDKN1B	CDKN1B
ACY3	-0.146572	-1.14486	1.29144	ACY3	ACY3
AMEX60DD007286	0.00401401	-1.22675	1.22273	AMEX60DD007286	AMEX60DD007286
LOC115074329	-0.466993	-0.922548	1.38954	LOC115074329	LOC115074329
AMEX60DD009502	0.047929	-1.24801	1.20008	AMEX60DD009502	AMEX60DD009502
TGM1	-0.231983	-1.09216	1.32415	TGM1	TGM1
DR999_PMT21178	-0.191611	-1.11765	1.30926	DR999_PMT21178	DR999_PMT21178
NGFR	-0.0954264	-1.17424	1.26967	NGFR	NGFR
KRT13	-0.696171	-0.717987	1.41416	KRT13	KRT13
KRT12	-0.00169405	-1.2239	1.22559	KRT12	KRT12
BCOR-RARA	-0.056957	-1.19527	1.25223	BCOR-RARA	BCOR-RARA
AMEX60DD010270	-0.10635	-1.1681	1.27445	AMEX60DD010270	AMEX60DD010270
AMEX60DD010274	-0.257141	-1.07576	1.3329	AMEX60DD010274	AMEX60DD010274
SLC25A47	-0.352311	-1.00998	1.36229	SLC25A47	SLC25A47
AMEX60DD012062	-0.15604	-1.13925	1.29529	AMEX60DD012062	AMEX60DD012062
THBS1	-0.249012	-1.0811	1.33012	THBS1	THBS1
KCTD11	-0.610623	-0.799385	1.41001	KCTD11	KCTD11
PER1	-0.625302	-0.78587	1.41117	PER1	PER1
LOC115077394	-0.208379	-1.10719	1.31557	LOC115077394	LOC115077394
AMEX60DD013375	-0.227643	-1.09495	1.3226	AMEX60DD013375	AMEX60DD013375
MIDN	-0.691344	-0.722753	1.4141	MIDN	MIDN
AMEX60DD013569	-0.617038	-0.793501	1.41054	AMEX60DD013569	AMEX60DD013569
PARPI_0020320	-0.110584	-1.1657	1.27629	PARPI_0020320	PARPI_0020320
FUT1	-0.108366	-1.16696	1.27533	FUT1	FUT1
ABCG1	-0.293105	-1.0516	1.3447	ABCG1	ABCG1
AMEX60DD017969	-0.563184	-0.841848	1.40503	AMEX60DD017969	AMEX60DD017969
LOC115458798	-0.163865	-1.13456	1.29843	LOC115458798	LOC115458798
PDGFA	0.0245665	-1.23684	1.21228	PDGFA	PDGFA
NOXO1	-0.40185	-0.973336	1.37519	NOXO1	NOXO1
A2M	-0.0459248	-1.20114	1.24706	A2M	A2M
LOC102473117	-0.148486	-1.14373	1.29222	LOC102473117	LOC102473117
A2M	-0.147632	-1.14424	1.29187	A2M	A2M
LOC115077990	-0.0701888	-1.18814	1.25833	LOC115077990	LOC115077990
LOC103261025	-0.376948	-0.991964	1.36891	LOC103261025	LOC103261025
APCDD1L	-0.011544	-1.21893	1.23048	APCDD1L	APCDD1L
TSHZ2	-0.269051	-1.06785	1.3369	TSHZ2	TSHZ2
LOC115084824	-0.0931031	-1.17554	1.26864	LOC115084824	LOC115084824
LOC101929829	-0.152096	-1.14159	1.29369	LOC101929829	LOC101929829
LOC101929829	-0.42903	-0.952511	1.38154	LOC101929829	LOC101929829
LOC115570446	0.0289139	-1.23895	1.21003	LOC115570446	LOC115570446
LOC101929829	-0.304883	-1.0435	1.34839	LOC101929829	LOC101929829
RND1	-0.366895	-0.999363	1.36626	RND1	RND1
FIGN	-0.299817	-1.047	1.34681	FIGN	FIGN
METTL7A	-0.452935	-0.933764	1.3867	METTL7A	METTL7A
KRT6A	-0.242588	-1.0853	1.32789	KRT6A	KRT6A
SLPI	-0.66276	-0.750545	1.41331	SLPI	SLPI
AMEX60DD032518	-0.131752	-1.15354	1.28529	AMEX60DD032518	AMEX60DD032518
UCKL1	-0.315676	-1.03601	1.35168	UCKL1	UCKL1
AMEX60DD032567	-0.417196	-0.961642	1.37884	AMEX60DD032567	AMEX60DD032567
SLC35F6	-0.162952	-1.13511	1.29806	SLC35F6	SLC35F6
SCARA5	-0.454346	-0.932645	1.38699	SCARA5	SCARA5
LPIN1	-0.234386	-1.09061	1.325	LPIN1	LPIN1
PXDN	-0.0337171	-1.20754	1.24126	PXDN	PXDN
SLC16A2	0.0699133	-1.2582	1.18829	SLC16A2	SLC16A2
CLOCK	-0.380441	-0.989376	1.36982	CLOCK	CLOCK
SLC6A14	-0.0678206	-1.18943	1.25725	SLC6A14	SLC6A14
MOSPD1	-0.304113	-1.04404	1.34815	MOSPD1	MOSPD1
SLC6A14	-0.186269	-1.12094	1.30721	SLC6A14	SLC6A14
STX3	-0.360732	-1.00387	1.3646	STX3	STX3
TUBB6	-0.105575	-1.16854	1.27411	TUBB6	TUBB6
KCTD1	-0.231201	-1.09267	1.32387	KCTD1	KCTD1
RNF125	-0.120817	-1.15986	1.28068	RNF125	RNF125
CEBPD	0.061925	-1.25453	1.19261	CEBPD	CEBPD
ATP8B2	-0.548424	-0.854692	1.40312	ATP8B2	ATP8B2
DNAJB5	-0.580252	-0.826781	1.40703	DNAJB5	DNAJB5
AMEX60DD041838	-0.609706	-0.800224	1.40993	AMEX60DD041838	AMEX60DD041838
PRLR	-0.0531737	-1.19729	1.25047	PRLR	PRLR
T3 up-regulated genes
FABP2	0.116674	-1.27891	1.16223	FABP2	FABP2
AMEX60DD044453	-0.637327	-0.774662	1.41199	AMEX60DD044453	AMEX60DD044453
AMEX60DD046991	-0.057082	-1.19521	1.25229	AMEX60DD046991	AMEX60DD046991
KCNE2	-0.551343	-0.852165	1.40351	KCNE2	KCNE2
KLHL34	-0.152235	-1.14151	1.29375	KLHL34	KLHL34
LOC113406022	-0.0073517	-1.22105	1.2284	LOC113406022	LOC113406022
RBP7	0.0651979	-1.25604	1.19084	RBP7	RBP7
NMNAT1	-0.0818623	-1.18176	1.26362	NMNAT1	NMNAT1
PRKCZ	-0.387013	-0.984486	1.3715	PRKCZ	PRKCZ
MEGF6	-0.0286933	-1.21015	1.23884	MEGF6	MEGF6
AMEX60DD051972	-0.466495	-0.922947	1.38944	AMEX60DD051972	AMEX60DD051972
AMEX60DD051976	-0.608929	-0.800933	1.40986	AMEX60DD051976	AMEX60DD051976
SLC16A12	-0.147377	-1.14439	1.29176	SLC16A12	SLC16A12
LOC101938004	-0.0830662	-1.1811	1.26416	LOC101938004	LOC101938004
INMT	-0.654126	-0.758796	1.41292	INMT	INMT
AMEX60DD054138	-0.161956	-1.13571	1.29767	AMEX60DD054138	AMEX60DD054138
AMEX60DD054395	-0.251137	-1.07971	1.33085	AMEX60DD054395	AMEX60DD054395
ACY3	-0.151384	-1.14202	1.2934	ACY3	ACY3
TRPV3	-0.0524467	-1.19768	1.25013	TRPV3	TRPV3
UBC	-0.284277	-1.05761	1.34188	UBC	UBC
KLF7	-0.0253109	-1.21189	1.2372	KLF7	KLF7
AMEX60DD055508	-0.120571	-1.16	1.28057	AMEX60DD055508	AMEX60DD055508

## Sheet: T2up
T2 up-regulated genes
gene	T2	CTRL	T3	GeneCards	NCBI
AMEX60DDU001016765	1.33509	-1.07147	-0.263616	AMEX60DDU001016765	AMEX60DDU001016765
FGF23	1.28967	-0.14227	-1.1474	FGF23	FGF23
VCX3B	1.33016	-1.08102	-0.249141	VCX3B	VCX3B
IGSF1	1.27381	-1.16894	-0.104864	IGSF1	IGSF1
AMEX60DD017442	1.34179	-1.05781	-0.283978	AMEX60DD017442	AMEX60DD017442
LOC115098183	1.2673	-1.17722	-0.0900747	LOC115098183	LOC115098183
LOC115476892	1.28747	-1.1505	-0.136968	LOC115476892	LOC115476892
FTCD	1.18752	-1.25885	0.0713366	FTCD	FTCD

## Sheet: Both up
T2 and T3 up-regulated genes
gene	T2	CTRL	T3	GeneCards	NCBI
LMX1B	0.168605	-1.30031	1.13171	LMX1B	LMX1B
YBX1	0.692332	-1.41411	0.721779	YBX1	YBX1
SUSD3	1.04912	-1.34585	0.296726	SUSD3	SUSD3
AADAC	0.948513	-1.38268	0.434171	AADAC	AADAC
KLHL24	0.150839	-1.29318	1.14234	KLHL24	KLHL24
DMTN	0.96961	-1.37637	0.406762	DMTN	DMTN
BCL6	0.447071	-1.38547	0.938401	BCL6	BCL6
KLF13	0.375864	-1.36863	0.992765	KLF13	KLF13
CYP1A1	1.04006	-1.34991	0.309858	CYP1A1	CYP1A1
CEMIP2	1.11343	-1.31183	0.198406	CEMIP2	CEMIP2
LGR4	0.422287	-1.38001	0.957726	LGR4	LGR4
BHLHE41	0.251284	-1.3309	1.07961	BHLHE41	BHLHE41
SLC25A18	0.16995	-1.30084	1.13089	SLC25A18	SLC25A18
ALDH3B1	0.229293	-1.32319	1.09389	ALDH3B1	ALDH3B1
LOC115460575	0.240683	-1.32722	1.08654	LOC115460575	LOC115460575
TSPO	0.76028	-1.41285	0.652566	TSPO	TSPO
LOC115073820	0.217653	-1.31898	1.10133	LOC115073820	LOC115073820
MAPT	1.14131	-1.29389	0.152579	MAPT	MAPT
PLXDC1	0.157934	-1.29605	1.13812	PLXDC1	PLXDC1
AMEX60DD010634	0.547188	-1.40295	0.85576	AMEX60DD010634	AMEX60DD010634
TNFRSF6B	0.785165	-1.41123	0.626062	TNFRSF6B	TNFRSF6B
TFR2	0.506367	-1.39673	0.890361	TFR2	TFR2
NFIC	1.03726	-1.35114	0.313874	NFIC	NFIC
AMEX60DD017971	0.265547	-1.33573	1.07019	AMEX60DD017971	AMEX60DD017971
SUSD3	1.09975	-1.31988	0.220127	SUSD3	SUSD3
TUBB3	0.912162	-1.39201	0.479852	TUBB3	TUBB3
TGM6	0.390778	-1.37245	0.981671	TGM6	TGM6
EMP1	0.196369	-1.31107	1.1147	EMP1	EMP1
LPO	0.587838	-1.40785	0.820009	LPO	LPO
ENDOU	0.280883	-1.34079	1.0599	ENDOU	ENDOU
WFDC8	0.29342	-1.3448	1.05138	WFDC8	WFDC8
SCARA3	0.285626	-1.34232	1.05669	SCARA3	SCARA3
SCARA3	0.414215	-1.37814	0.963926	SCARA3	SCARA3
ARG1	0.158799	-1.2964	1.1376	ARG1	ARG1
FHDC1	0.264902	-1.33552	1.07062	FHDC1	FHDC1
AMEX60DD036790	0.304919	-1.3484	1.04348	AMEX60DD036790	AMEX60DD036790
AMEX60DD036792	0.753153	-1.41319	0.660038	AMEX60DD036792	AMEX60DD036792
GUCY2F	1.09724	-1.32131	0.224068	GUCY2F	GUCY2F
LOC102350019	0.201045	-1.31283	1.11178	LOC102350019	LOC102350019
AMEX60DD041343	0.155374	-1.29502	1.13964	AMEX60DD041343	AMEX60DD041343
B4GALT3	0.630629	-1.41155	0.78092	B4GALT3	B4GALT3
AB205_0023170	0.734758	-1.41385	0.67909	AB205_0023170	AB205_0023170
GFI1B	0.97887	-1.37338	0.394511	GFI1B	GFI1B
AMEX60DD054837	1.07762	-1.33194	0.254313	AMEX60DD054837	AMEX60DD054837
GYPC	0.715939	-1.41418	0.698238	GYPC	GYPC
